# Supplementary material for: Semiconducting properties of pyridyl appended linear dicarboxylate based coordination polymers: theoretical predictionviaDFT study
Source: Royal Society of Chemistry journal article supplement (doi:10.1039/d0dt03868g), 2020-11-24
Supplement: d0dt03868g1.pdf [file d0dt03868g1.pdf]

## **Electronic Supplementary Information**

### **Semiconducting properties of pyridyl appended linear dicarboxylate based coordination polymers: theoretical prediction via DFT study**

Faruk Ahmed,<sup>a,b</sup> Joaquín Ortega-Castro,<sup>c</sup> Antonio Frontera\*<sup>c</sup> and Mohammad Hedayetullah Mir\*<sup>a</sup>.

a. Department of Chemistry, Aliah University, New Town, Kolkata 700 156, India.

*Email:* [chmmir@gmail.com](mailto:chmmir@gmail.com)

b. Department of Chemistry, Saheed Nurul Islam Mahavidyalaya, Tentulia, West Bengal 743 286, India.

c. Departament de Química, Universitat de les Illes Balears, Crta. de Valldemossa km 7.5, 07122 Palma de Mallorca, Balears, Spain. E-mail: [toni.frontera@uib.es](mailto:toni.frontera@uib.es)

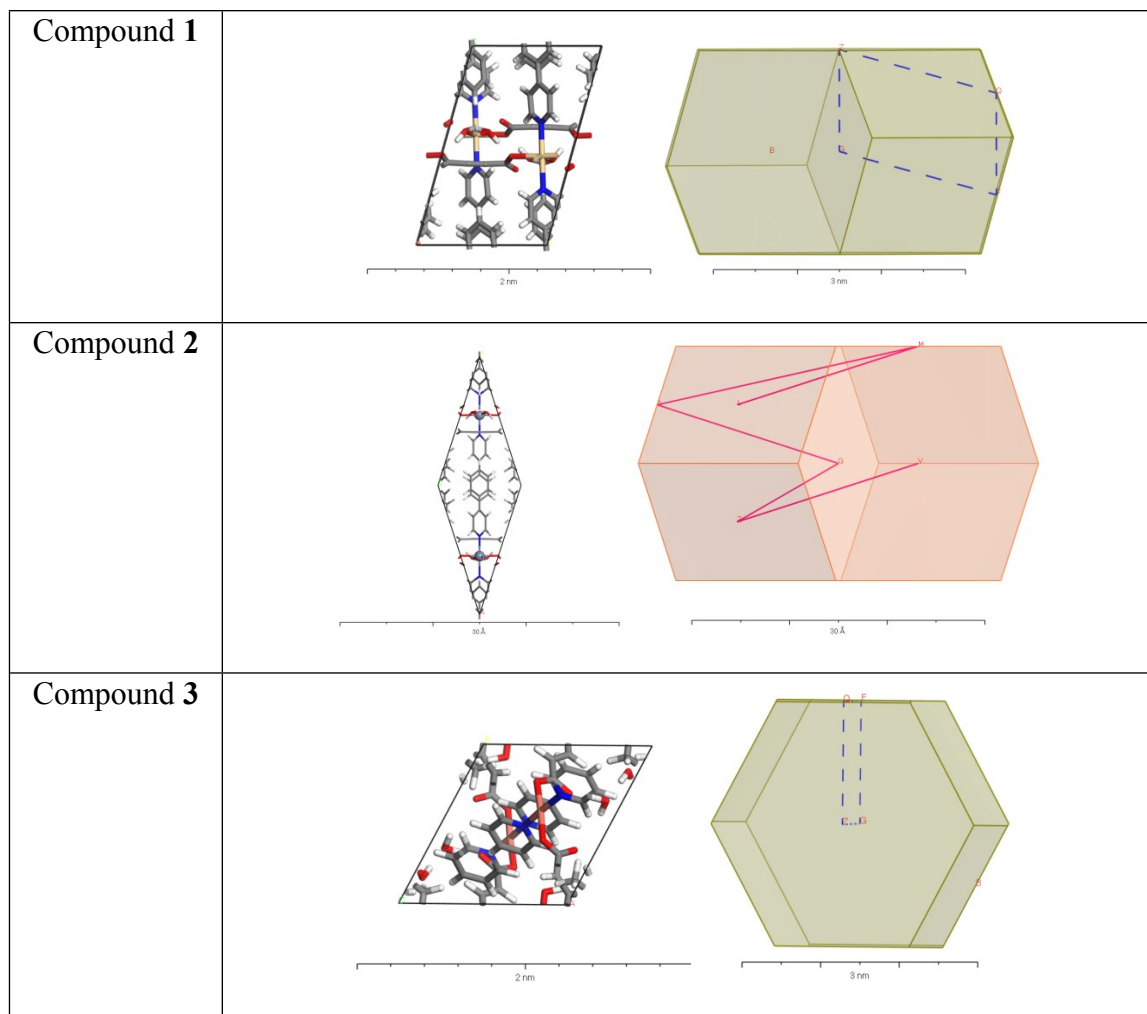

**Fig. S1** Unit Cells of the polymers studied theoretically in this work. On the right, the used brillouin zones are shown, as well as the special k-points represented in the band diagram.

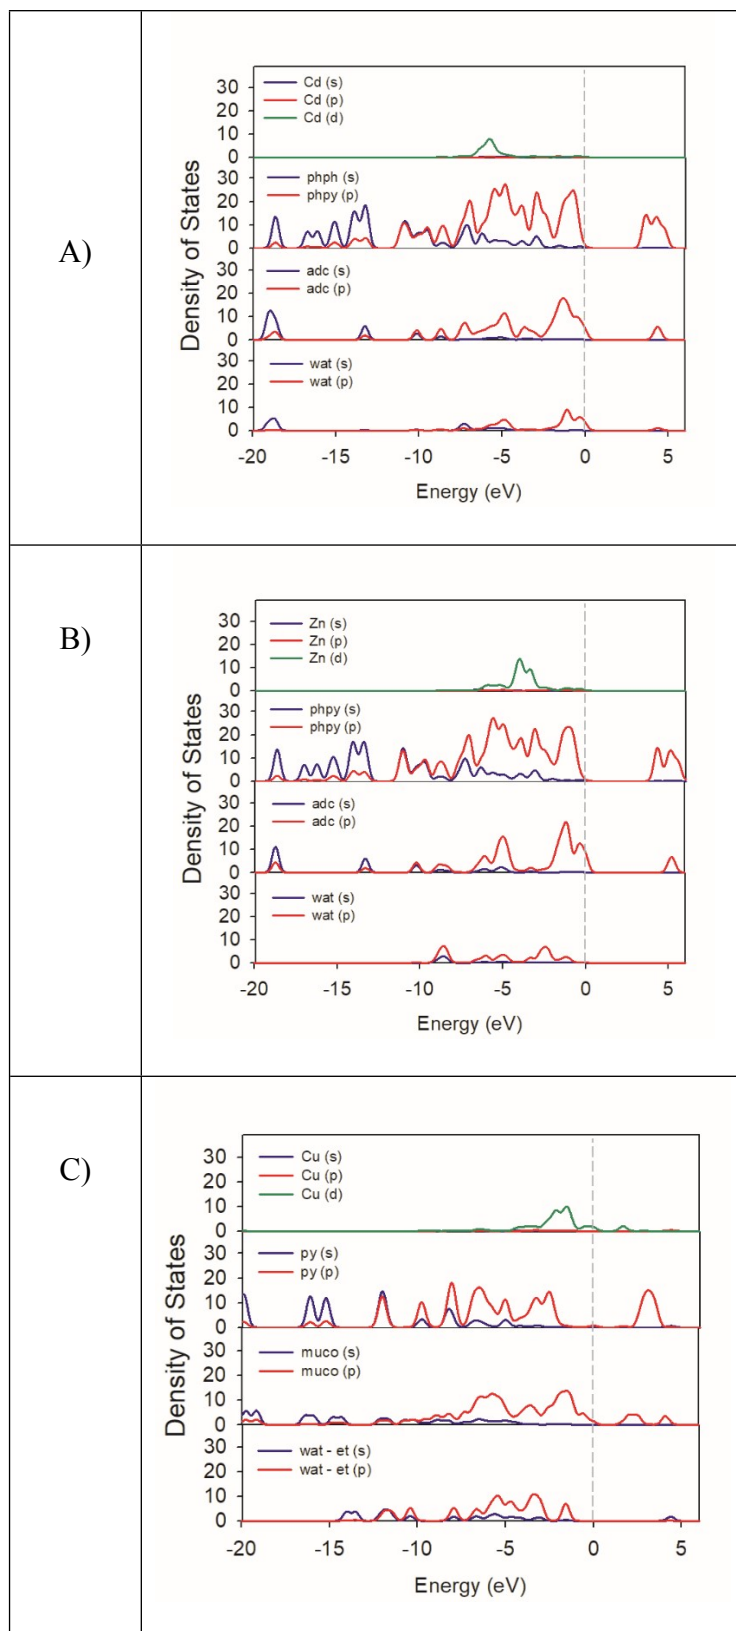

**Fig. S2** Completed PDOS of the CPs calculated in this work; A) compound **1**, B) compound **2**, C) compound **3**.

**Table S1.** Geometric measurements (bond length (Å), bond angles (°) and dihedral angles (°)) of the ground state, 1<sup>st</sup> and 2<sup>nd</sup> excited states of compound **1**.

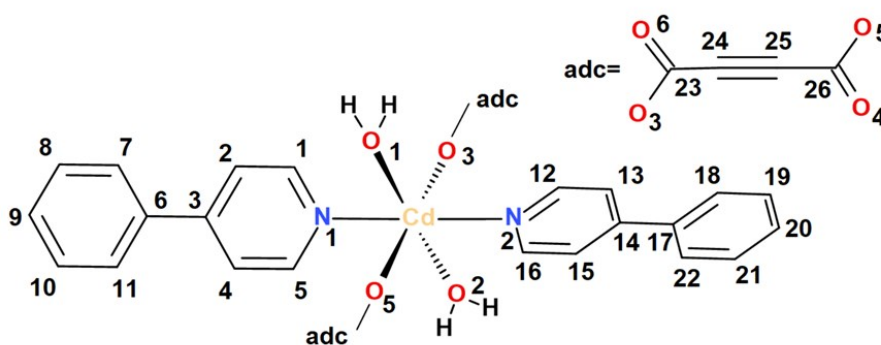

| 4-Phpy  | GS   | 1st  | 2nd  | Adc             | GS   | 1st  | 2nd  |
|---------|------|------|------|-----------------|------|------|------|
| Cd-N1   | 2.34 | 2.34 | 2.34 | O3-C23          | 1.29 | 1.28 | 1.28 |
| Cd-N2   | 2.33 | 2.33 | 2.37 | O6-C23          | 1.26 | 1.25 | 1.25 |
| Cd-O1   | 2.35 | 2.36 | 2.35 | C23-C24         | 1.45 | 1.46 | 1.46 |
| Cd-O2   | 2.36 | 2.35 | 2.35 | C24-C25         | 1.22 | 1.21 | 1.21 |
| Cd-O3   | 2.33 | 2.33 | 2.33 | C25-C26         | 1.45 | 1.46 | 1.46 |
| Cd-O5   | 2.32 | 2.32 | 2.32 | O4-C26          | 1.26 | 1.25 | 1.25 |
| N1-C1   | 1.35 | 1.36 | 1.36 | O5-C26          | 1.29 | 1.28 | 1.28 |
| C1-C2   | 1.39 | 1.39 | 1.39 |                 |      |      |      |
| C2-C3   | 1.41 | 1.41 | 1.41 | O1-Cd-O3        | 89.9 | 85.9 | 86.0 |
| C3-C4   | 1.40 | 1.41 | 1.41 | O3-Cd-O2        | 90.9 | 91.6 | 91.5 |
| C4-C5   | 1.38 | 1.39 | 1.39 | O2-Cd-O5        | 92.5 | 96.2 | 86.7 |
| C5-N1   | 1.35 | 1.36 | 1.36 | O5-Cd-O1        | 87.7 | 86.9 | 96.5 |
| C3-C6   | 1.47 | 1.48 | 1.48 | N1-Cd-O3        | 97.0 | 97.5 | 97.8 |
| C6-C7   | 1.41 | 1.41 | 1.41 | N2-Cd-O3        | 80.0 | 81.7 | 98.9 |
| C7-C8   | 1.39 | 1.40 | 1.40 | C2-C3-C6-C7     | 16.6 | 19.5 | 19.5 |
| C8-C9   | 1.40 | 1.40 | 1.40 | C13-C14-C17-C18 | 18.8 | 10.0 | 9.2  |
| C9-C10  | 1.39 | 1.40 | 1.40 |                 |      |      |      |
| C10-C11 | 1.39 | 1.40 | 1.40 |                 |      |      |      |
| C11-C6  | 1.41 | 1.41 | 1.41 |                 |      |      |      |
| N2-C12  | 1.35 | 1.36 | 1.36 |                 |      |      |      |
| C12-C13 | 1.39 | 1.36 | 1.38 |                 |      |      |      |
| C13-C14 | 1.40 | 1.38 | 1.43 |                 |      |      |      |
| C14-C15 | 1.40 | 1.43 | 1.43 |                 |      |      |      |
| C15-C16 | 1.38 | 1.43 | 1.38 |                 |      |      |      |
| C16-N2  | 1.35 | 1.38 | 1.36 |                 |      |      |      |
| C14-C17 | 1.47 | 1.44 | 1.44 |                 |      |      |      |
| C17-C18 | 1.40 | 1.43 | 1.44 |                 |      |      |      |
| C18-C19 | 1.39 | 1.38 | 1.38 |                 |      |      |      |
| C19-C20 | 1.40 | 1.41 | 1.41 |                 |      |      |      |
| C20-C21 | 1.40 | 1.41 | 1.41 |                 |      |      |      |
| C21-C22 | 1.39 | 1.38 | 1.38 |                 |      |      |      |
| C22-C17 | 1.40 | 1.43 | 1.44 |                 |      |      |      |

**Table S2.** Geometric measurements (bond length (Å) and bond angles (°)) of the ground state, 1<sup>st</sup> and 2<sup>nd</sup> excited states of compound **3**.

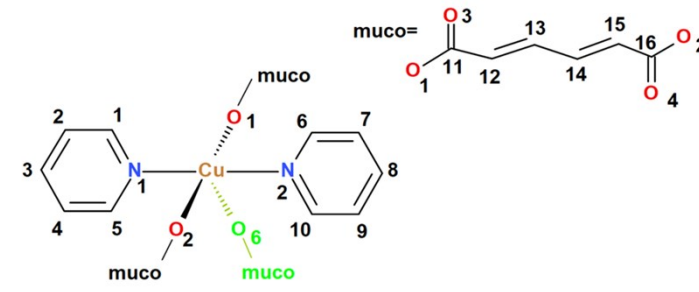

| Py     | GS   | 1st  | 2nd  | Muco     | GS   | 1st  | 2nd  |
|--------|------|------|------|----------|------|------|------|
| Cu-N1  | 2.07 | 2.12 | 2.11 | O1-C11   | 1.29 | 1.28 | 1.30 |
| Cu-N2  | 2.06 | 2.12 | 2.11 | O3-C11   | 1.26 | 1.27 | 1.26 |
| Cu-O1  | 1.99 | 2.06 | 2.04 | C11-C12  | 1.47 | 1.47 | 1.47 |
| Cu-O2  | 2.01 | 2.06 | 2.08 | C12-C13  | 1.35 | 1.35 | 1.35 |
| Cu-O6  |      | 2.22 | 2.23 | C13-C14  | 1.43 | 1.43 | 1.43 |
| N1-C1  | 1.35 | 1.35 | 1.35 | C14-C15  | 1.35 | 1.35 | 1.35 |
| C1-C2  | 1.39 | 1.39 | 1.39 | C15-C16  | 1.47 | 1.47 | 1.47 |
| C2-C3  | 1.39 | 1.40 | 1.40 | O2-C16   | 1.29 | 1.28 | 1.30 |
| C3-C4  | 1.40 | 1.40 | 1.40 | O4-C16   | 1.26 | 1.27 | 1.26 |
| C4-C5  | 1.39 | 1.39 | 1.39 |          |      |      |      |
| C5-N1  | 1.35 | 1.35 | 1.35 | N1-Cu-O1 | 89.8 | 90.0 | 89.4 |
| N2-C6  | 1.35 | 1.35 | 1.35 | N1-Cu-O2 | 90.7 | 91.6 | 91.7 |
| C6-C7  | 1.39 | 1.39 | 1.39 | N2-Cu-O2 | 88.1 | 87.6 | 87.3 |
| C7-C8  | 1.40 | 1.40 | 1.39 | N2-Cu-O2 | 91.7 | 91.8 | 92.4 |
| C8-C9  | 1.40 | 1.40 | 1.40 |          |      |      |      |
| C9-C10 | 1.39 | 1.39 | 1.39 |          |      |      |      |
| C10-N2 | 1.35 | 1.35 | 1.35 |          |      |      |      |

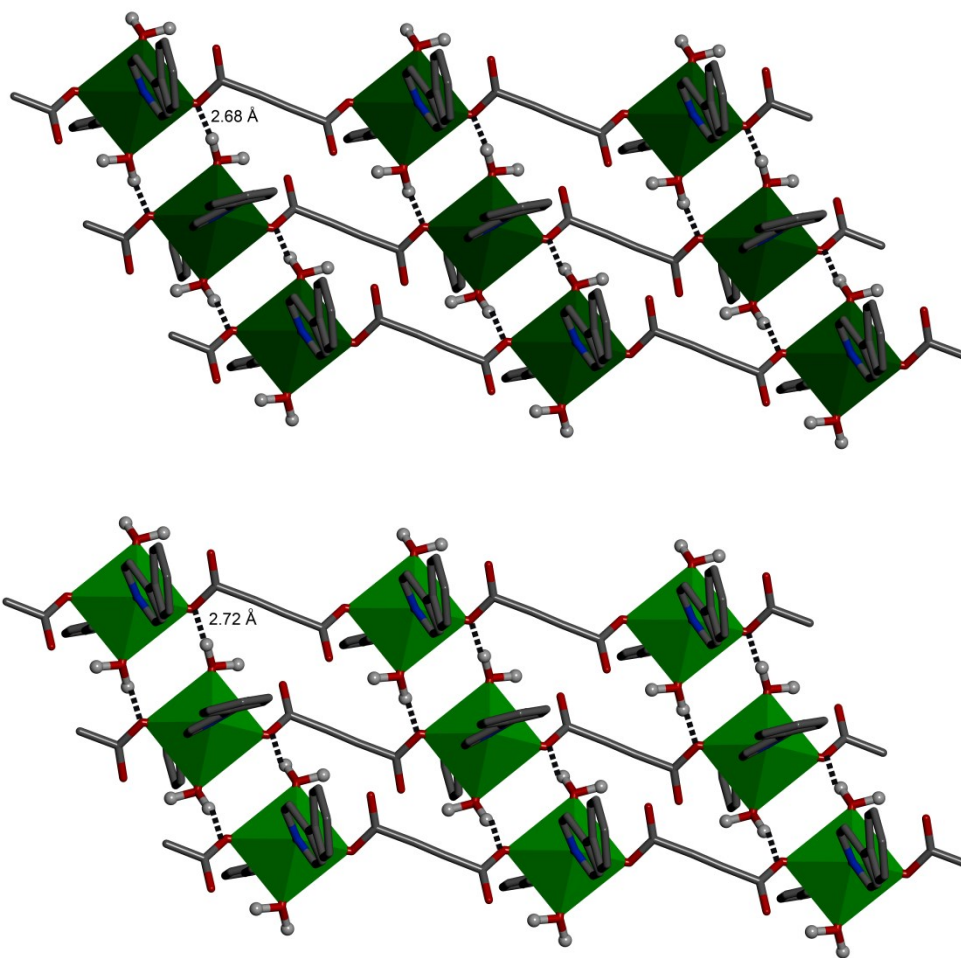

**Fig. S3** View of hydrogen bonding interactions in **1** (top) and **2** (bottom) forming 2D networks.
